## Broadband Tuning the Voltage Dependence of a Sodium Channel

Eedann McCord, Goragot Wisedchaisri, and William A. Catterall

Department of Pharmacology, University of Washington, Seattle, WA 98195-7280 USA

### GRAPHICAL ABSTRACT

The complete range of broadband tuning of voltage-dependent activation of a sodium channel.

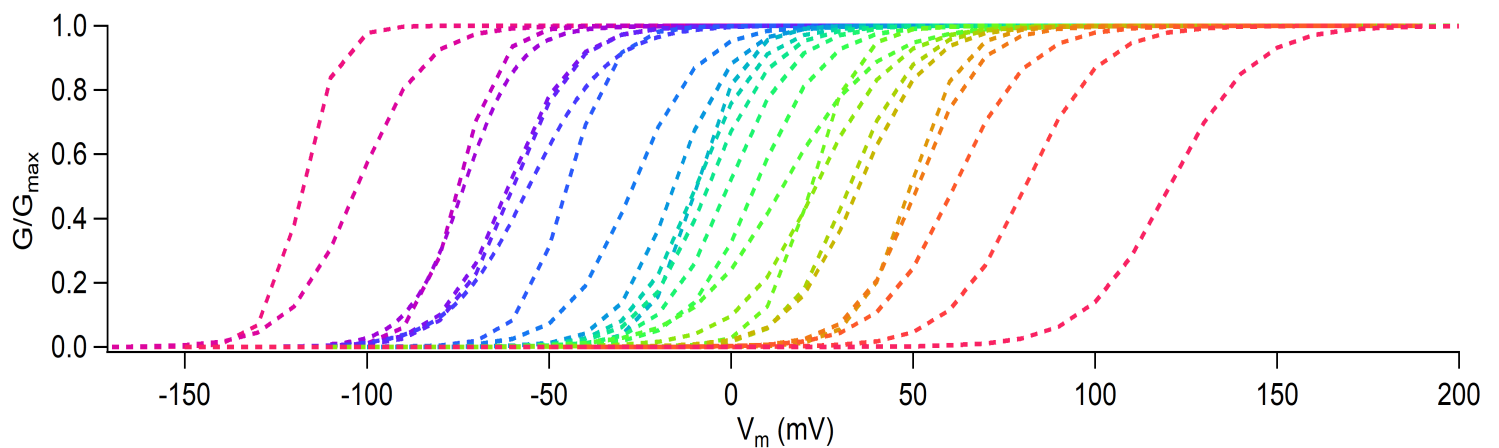

## ABSTRACT

Voltage-gated sodium channels initiate action potentials in prokaryotes and in many eukaryotic cells, including vertebrate nerve and muscle. Their activation is steeply voltage-dependent, but it is unclear how the voltage sensitivity is set or whether it can be broadly shifted to positive voltages. Here we show that the voltage dependence of activation ( $V_A$ ) of the ancestral bacterial sodium channel  $Na_vAb$  can be progressively shifted from -118 mV to +35 mV in chimeras with increasing numbers of amino acid residues from the extracellular half of the voltage sensor of human  $Nav1.7$  channels. In a minimal chimera in which only 32 residues were transferred, we analyzed the effects of six additional mutations of conserved amino acid residues singly, in pairs, and as triple mutations. The resulting chimeric mutants exhibited a broad range of voltage sensitivity from  $V_A = -118$  mV to  $V_A = +120$  mV. Three mutations (N48K, L112A, and M119V) shifted  $V_A$  to +61 mV when substituted in  $Na_vAb$  itself, and substitution of two additional Cys residues in the Cys-free background of  $Na_vAb$  further shifted  $V_A$  to +105 mV. In these mutants, measurement of gating currents revealed that the voltage dependence of gating charge movement ( $V_Q$ ) shifted to positive membrane potentials as much or more than  $V_A$ , confirming that the gating charges are trapped in their resting positions by these  $V_A$ -shifting mutations. Our results demonstrate broadband shifting of  $V_A$  and  $V_Q$  of a sodium channel across a range of 240 mV and provide a toolbox of methods and constructs to analyze sodium channel structure and function in the resting state at 0 mV and in activated states at positive membrane potentials.

## INTRODUCTION

Animal life depends on electrical signaling via action potentials. The swift conduction of action potentials along the cell surface of neurons, myocytes, and other excitable cells confers the ability to coordinate rapid events – allowing animals to breathe, move, and think (Hille, 2001; Hodgkin and Huxley, 1952). Action potentials are initiated by voltage-gated sodium channels, which open in response to membrane depolarization and then inactivate within 1-5 msec (Hodgkin and Huxley, 1952). Depolarization of the cell membrane also activates voltage-gated potassium channels, which open more slowly and conduct potassium out of the cell to repolarize the membrane potential (Hodgkin and Huxley, 1952). In order to explain the voltage dependence of activation of sodium channels, Hodgkin and Huxley proposed that membrane-bound charges associated with sodium channels respond to the change in electric field, move across the membrane upon depolarization, and return to their resting position upon repolarization. Based on the steepness of voltage-dependent activation, they proposed that 3 singly charged ‘gating particles’ control activation and one gating particle controls inactivation (Hodgkin and Huxley, 1952). Their prescient prediction was confirmed when the movement of these gating particles was directly measured in the form of gating currents, which are nonlinear capacitive currents that arise from the movement of the gating particles (Armstrong and Bezanilla, 1973, 1977; Bezanilla and Armstrong, 1977). Fast, outward movement of positive gating charge was triggered by depolarization (ON gating currents), and a corresponding inward OFF gating current was observed upon hyperpolarization of the membrane. These gating currents are the electrical signature of the voltage-dependent activation process.

The protein components of sodium channels were initially identified by photolabeling studies using scorpion toxins, which revealed a complex of an  $\alpha$  subunit and a smaller  $\beta$  subunit (Beneski and Catterall, 1980). Sodium channels were purified from electric eel electroplax (Barchi, 1983; Miller et al., 1983), skeletal muscle (Barchi, 1983), and brain (Hartshorne and Catterall, 1981, 1984; Hartshorne et al., 1982). The brain sodium channel was reconstituted into phospholipid bilayers and vesicles, and measurement of ion flux and single-channel currents verified that these purified proteins were in fact voltage-gated sodium channels (Hartshorne et al., 1985; Talvenheimo et al., 1982; Tamkun et al., 1984). Cloning and sequencing cDNA encoding sodium channel  $\alpha$  subunits revealed a polypeptide of ~2000 amino acid residues having 24 transmembrane segments organized in six homologous domains (Noda et al., 1986; Noda et al., 1984). Extensive structure-function studies showed that the first four helices (S1-S4) of each subunit comprise the voltage-sensing domain (VS), while the fifth and sixth (S5-S6) transmembrane helices from all four subunits come together to form the pore module (PM)

(Catterall, 2000). The S4 segment contains a repeated motif of a positively charged residue flanked on each side by hydrophobic ones in a three-residue pattern that is repeated 4-8 times in sodium channel VS. Mutagenesis studies revealed that these charged residues on the S4 segment serve as the gating charges that enable the VS to sense fluctuations in membrane potential and respond by opening the pore (Bezanilla, 2000; Catterall, 2000; Kontis et al., 1997; Stuhmer et al., 1989). Chemical labeling, voltage-clamp fluorometry, and disulfide-crosslinking studies revealed that changes in membrane potential drive the S4 segments of sodium channels across the membrane through a narrow hydrophobic seal, catalyzed by interactions with negative charges on the intracellular and extracellular sides (Chanda and Bezanilla, 2002; DeCaen et al., 2011; DeCaen et al., 2009; DeCaen et al., 2008; Yang et al., 1996; Yang and Horn, 1995; Yarov-Yarovoy et al., 2012). A “sliding-helix” model in which the S4 segment moves outward through the VS upon depolarization and exchanges ion pair partners has emerged as a consensus mechanism for voltage sensing (Catterall, 1986; Catterall et al., 2017; Vargas et al., 2012; Wisedchaisri et al., 2019; Yarov-Yarovoy et al., 2012).

The unexpected discovery of bacterial sodium channels showed that they are homotetrameric complexes of four identical subunits with six transmembrane segments (Ren et al., 2001). This simple organization facilitated structural studies using X-ray crystallography, which defined the structure of the bacterial sodium channel Na<sub>v</sub>Ab at 2.7 Å resolution (Payandeh et al., 2011). Other bacterial sodium channels have similar structures (Ahern et al., 2016; Catterall et al., 2017; McCusker et al., 2012; Zhang et al., 2012). Moreover, eukaryotic sodium channels analyzed by cryo-electron microscopy (cryo-EM) have a similar core structure, with RMSD in the range of 3 Å for the transmembrane regions of mammalian sodium channels from skeletal muscle, nerve, and heart (Jiang et al., 2020; Pan et al., 2019; Pan et al., 2018; Shen et al., 2019). These structural results enabled analysis of the molecular basis of voltage-dependent gating at the atomic level, but the range of functional states observed in these structural studies was limited because they were all carried out in the absence of a membrane potential where partially activated and steady-state inactivated states of sodium channels are most stable. Here we used a combination of structure-guided mutagenesis and biophysical analysis to tune the voltage dependence of sodium channels over a broad range and determine whether they can function normally in the positive membrane potential range. Our results reveal that broadband tuning of the voltage dependence of a sodium channel over a range up to 240 mV is possible (see Graphical Abstract), and they provide a novel approach to analysis of the structure and function of sodium channels in multiple states that normally would not be accessible for study by structural biology methods at 0 mV. As proof of this concept, we have used one of the constructs described here to determine the structure of the resting state of a sodium channel at high resolution (Wisedchaisri et al., 2019).

## MATERIALS AND METHODS

### Construction of NavAb/Nav1.7-VS2 chimera and mutants

NavAb/Nav1.7-VS2 cDNAs with a wide range of voltage-shifting mutations and combinations were constructed in order to explore the range of positive shifts in the voltage dependence of activation that are possible. These NavAb/Nav1.7-VS2 chimeras were generated by grafting nucleotide sequences of S1-S2 and S3-S4 segments of Nav1.7 VS2 into homologous regions in NavAb. The cDNAs encoding NavAb/Nav1.7-VS2 chimeras were generated by overlap extension PCR (Heckman and Pease, 2007) for NavAb 7DII, and by gene synthesis for NavAb 7DII-4 and 7DII-5. These cDNAs were then amplified by PCR and cloned into the modified pIZT vector described previously (Wisedchaisri et al. 2019). Briefly, the pIZT vector (Life Technologies) was modified to include GFP followed by a self-cleaving P2A sequence under an OpIE2 promoter to facilitate identification of transfected Sf9 cells for electrophysiological recording, and NavAb and mutants were expressed as GFP-P2A-NavAb. NavAb 7DII-2 and 7DII-3 chimeras were derived from NavAb 7DII-4 by site-directed mutagenesis. Single, double, and triple residue substitutions in NavAb 7DII chimeras and NavAb were carried out by site-directed mutagenesis. All constructs were characterized by electrophysiology using transfected Sf9 cells as described previously (Wisedchaisri et al., 2019). For more experimental details on construction and functional characterization of these constructs, see McCord, E., Broadband tuning the voltage dependence of a sodium channel. PhD Dissertation, University of Washington: <https://digital.lib.washington.edu/researchworks/handle/1773/45249>.

### Electrophysiology

1.5-3 M $\Omega$  glass pipettes were used to patch-clamp fluorescent Sf9 cells, and sodium currents were recorded via whole-cell voltage clamp (EPC10, Pulse, HEKA), sampled at 250 kHz or 500 kHz, and filtered at 3, 8, or 10 kHz. Membrane capacitance ranged from 5-25 pF. Rs was below 10 M $\Omega$ , with a 2  $\mu$ s lag and at least 70% compensation, or with voltage error below 10 mV. A P/4 capacitive transient subtraction protocol was used for ionic current, and P/5 was used for gating current measurements, taking care to measure the leak current well outside of the voltage range of gating charge movement. Standard recording solutions were as follows: Intracellular (in mM): NaCl (35), CsF (105), EGTA (10), HEPES (10); Extracellular (in mM): NaCl (140), MgCl<sub>2</sub> (2), CaCl<sub>2</sub> (2), HEPES (10). In order to analyze NavAb mutants with positively shifted voltage dependence, solutions were designed to result in reversal potentials outside the range of the voltage response by substituting NMDG-Cl for NaCl in both solutions as needed. For gating charge measurements, the intracellular solution contained NMDG-Cl (140), EGTA (10), HEPES

(10), MgCl<sub>2</sub> (1), and external contained NMDG-Cl (148), HEPES (10), MgCl<sub>2</sub> (3). The pH for both intracellular and extracellular solutions was 7.4, adjusted with CsOH/HCl and NaOH/HCl for solutions that contained no NMDG-Cl, respectively, and NMDG+/HCl for those containing NMDG. The measured liquid junction potential was -7 mV for ionic current recordings, and the reported voltages were not adjusted. Ionic current families were generated by holding cells at -150 mV and stimulating with a series of 50-ms pulses at 10-mV intervals. All scale bars denote 1 nA/10 msec. To determine the reversal potential of outward current, peak current was elicited by pulsing to an appropriate potential for each construct and decreasing the voltage in 10 mV steps until substantial inward current was seen in the tail currents. An agar bridge consisting of extracellular solution with 3% Agar was placed between the reference electrode and the bath in experiments utilizing perfusion of extracellular solution containing reducing agents to isolate the electrode from the reducing agents.

### Data analysis

Data were analyzed using IGOR Pro (6.37). The peak current at each voltage of the current family was averaged and plotted as a function of the stimulus voltage to visualize the current vs voltage (I/V) relationship. When the I/V curves contained only outward current, the reversal potential ( $V_{rev}$ ) was determined from the tail currents at peak activation. The instantaneous current of the tail current family was plotted as a function of voltage, fit with a line near 0 mV, and the X intercept was used as  $V_{rev}$  to generate the conductance vs voltage (G/V) curve from the I/V curve by calculating  $G=I/(V_m-V_{rev})$ . Normalized G/V curves were fit with a simple two-state Boltzmann equation  $1/(1+\exp((V_{1/2}-V_m)/k))$  in which  $V_m$  is the stimulus potential,  $V_A$  is the half-activation voltage, and k is a slope factor. I/V plots of inward currents were fit with  $(V_m-V_{rev})*(I_{min}/(1+\exp((V_m-V_A)/k)))$  to generate Boltzmann relationships fit to normalized G/V curves. Q/V curves were generated by integrating the P/N subtracted curve either during the test pulse or after the return to the prepulse voltage.

## RESULTS

We took a stepwise approach to determining whether broadband tuning of the voltage dependence of activation ( $V_A$ ) of a sodium channel is feasible. First, we asked whether formation of chimeric channels with amino acid residues from a mammalian sodium channel is able to induce positive shifts in the  $V_A$  of  $\text{Na}_V\text{Ab}$ . Second, we surveyed the  $V_A$ -shifting effects of single amino acid substitutions selected from the literature, which were known to induce positive shifts in  $V_A$  in other channel types. Third, we assessed the effects of pairwise and triple combinations of these mutations in chimeric mammalian  $\text{Na}_V1.7/\text{Na}_V\text{Ab}$  channels. Fourth, we determined if a selected triple-mutant combination was able to shift the  $V_A$  of  $\text{Na}_V\text{Ab}$  itself and analyzed whether those positive shifts in  $V_A$  are accompanied by similar positive shifts in the voltage dependence of gating charge movement ( $V_Q$ ). To facilitate clear presentation of this large amount of data, we focus on measurements of  $V_A$  and  $V_Q$ . Additional data on the kinetics of activation and inactivation and on steady-state inactivation of selected mutants are available in McCord, PhD Dissertation, University of Washington: <https://digital.lib.washington.edu/researchworks/handle/1773/45249>.

### Shifting Voltage Dependence of a Chimeric Sodium Channel

The bacterial sodium channel  $\text{Na}_V\text{Ab}$  activates at very negative membrane potentials, with  $V_A = -98$  mV (Gamal El-Din et al., 2013a). Mammalian  $\text{Na}_V$  channels activate at much more depolarized membrane potentials. For example, the  $\text{Na}_V1.7$  channel activates with a  $V_A$  of  $-22$  mV (Wu et al., 2013). To test whether substitution of amino acid residues from mammalian  $\text{Na}_V1.7$  into the VS of  $\text{Na}_V\text{Ab}$  could shift its voltage dependence, we constructed and analyzed chimeras of  $\text{Na}_V\text{Ab}$  and  $\text{Na}_V1.7$  (Figure 1; Table 1). The basic chimera 7DII contained the extracellular residues of the human  $\text{Na}_V1.7$  DII VSD, starting near the extracellular end of each transmembrane helix (Figure 1A and C, left, Table 1). This construction shortened the S1-S2 linker by one residue and lengthened the S3-S4 linker by four residues, resulting in a net gain of three residues for the channel (Table 1). We measured the sodium current observed when this chimera was depolarized to a range of membrane potentials, and we calculated the conductance as a function of stimulus potential. The resulting conductance/voltage (G/V) curves for chimera 7DII revealed a similar voltage dependence of activation to  $\text{Na}_V\text{Ab}$  ( $V_A = -118 \pm 0.9$  mV; Figure 1B, red; Table 2). In contrast to this small effect on voltage dependence, substitution of additional amino acid residues in chimera 7DII caused large positive voltage shifts.  $V_A$  shifted to  $-7.5 \pm 1.7$  mV for chimera 7DII-2 (Figure 1B, orange) and further shifted to  $+34.6 \pm 1.4$  mV for chimera 7DII-3 (Figure 1B, blue), a total voltage shift of  $+153$  mV (Table 2). These large voltage shifts were caused by human  $\text{Na}_V1.7$  residues substituted for  $\text{Na}_V\text{Ab}$  residues over the extracellular halves



of the S1-S4 segments (Figure 1C). This dramatic positive shift of  $V_A$  suggested the possibility that the voltage dependence of chimera 7DII could be tuned over a broad voltage range by substitutions of individual amino acid residues and by pairwise and triple combinations of individual mutations.

### Shifting $V_A$ with Single Mutations

$Na_vAb$  has three distinct kinetic phases of slow inactivation: two that are easily reversible by hyperpolarization, and one “late use-dependent phase” that is induced by repetitive depolarizing pulses and reverses very slowly (Blanchet and Chahine, 2007; Gamal El-Din et al., 2013b; Pavlov et al., 2005). The late phase of inactivation makes stable recordings of voltage-dependent properties of  $Na_vAb$  channels impractical. Previous work showed that the mutation N49K (numbered N48K in the  $Na_vAb/Na_v1.7$  7DII chimera) caused a positive shift in  $V_A$  and blocked slow, use-dependent inactivation of  $Na_vAb$  (Gamal El-Din et al., 2013a). As expected from this prior work, the N48K mutation in chimera 7DII shifted 73 mV from  $V_A = -118 \pm 0.9$  mV to  $V_A = -45.4 \pm 0.9$  mV (Figures 2 and 3, red), and it eliminated the late use-dependent inactivation (not shown). This residue is located in a conserved site on the S2 segment containing an amino acid residue in the Extracellular Negative Cluster (ENC) that acts as a counter charge to the positive gating charges (Figure 2C). In  $Na_vAb$ , the native residue is Asn, which is hydrophilic and has a partial net negative charge. Placing a positive charge in this position may alter gating charge interactions and oppose both activation and slow, use-dependent inactivation.

To test whether other substitutions of single non-gating-charge residues would have comparable effects, we searched the literature for previously described, highly conserved residues whose mutation caused large positive shifts in  $V_A$ . Mutagenesis studies of *Shaker B* potassium channels highlighted the residue equivalent to N25, located in the center of the VS, as a potential voltage-shifting amino acid substitution ((Lacroix et al., 2014); Figure 2C, Table 1). Mutation of N25 to Phe shifted the  $V_A$  by +57 mV to  $V_A = -61.0 \pm 1.4$  mV (Figure 2A and B, orange; Table 3). Thus, this mutation has comparable effects on  $V_A$  in an insect potassium channel and a bacterial sodium channel.

Continuing this line of investigation, we sought well-characterized mutations of conserved amino acid residues located near the intracellular end of S4 that cause positive shifts in  $V_A$ . We first focused on  $Na_vAb/L109$  (Table 1), whose counterpart in *Shaker B* potassium channels and  $Na_v1.2$  sodium channels yielded large positive shifts in  $V_A$  upon mutation (Kontis et al., 1997; Lopez et al., 1991). Mutation of the corresponding residue in 7DII (L112, Table 1, Figure 2C) to Ala caused a positive shift of  $V_A$  to  $-55.0 \pm 4.9$  mV in 7DII (Figure 2A and B, green; Table 3). Taking a similar approach, we found that mutation M119V of 7DII positively shifted  $V_A$  to  $-70.0 \pm$



1.2 mV (Figure 2A and B, purple; Table 3). L112A is located directly after R4, and M119 begins the S4-S5 linker (Figure 2C). Thus, these two amino acid residues flank the intracellular end of the S4 segment and may impede its movement during voltage sensing and gating.

These results suggested that the intracellular end of the S4 segment might be a hotspot for  $V_A$ -shifting mutations. To follow up that idea, we analyzed the effects of a mutation of the R4 gating charge that preserves its positive charge (R111K) and a mutation of T114 (T114K; Tables 1 and 3) that introduces an additional positive charge in register with the R1-R4 gating charges. Substitution of these residues also resulted in positive shifts of  $V_A$ , with R111K causing a +58-mV shift of  $V_A$  to  $-59.8 \pm 6.6$  mV (Figure 3, blue) and T114K causing a +16-mV shift of  $V_A$  to  $-102 \pm 2.9$  mV (Figure 3, yellow). Altogether, these experiments identify a set of conserved amino acid residues whose mutation individually causes substantial positive shifts in  $V_A$ .

### Pairwise Combinations of $V_A$ Shifting Mutations

Because these individual mutations gave promising results showing substantial positive shifts in  $V_A$ , we analyzed the effects of pairwise combinations of selected  $V_A$ -shifting mutations (Figure 4). The effects of the combined mutations R111K and T114K were greater than additive, as the total shift in  $V_A$  of the double mutant (+102 mV) was greater than the sum of the two individual shifts in  $V_A$  (+74 mV, Figure 4A and B, brown, Table 4). The combined shift of  $V_A$  of the N48K/R111K double mutant was +156 mV, which exceeds the sum of the individual shifts of +131 mV (Figure 4C, blue; Table 4). The combinatorial effects of mutation N48K with R111S or R111C on  $V_A$  were smaller than R111K, but also showed cumulative positive shifts in  $V_A$  (Figure 4C, yellow and green; Table 4). These results encouraged us to construct triple mutations to search for combinations that gave even larger positive shifts in  $V_A$ .

### Triple Combinations of $V_A$ Shifting Mutations

We studied substitutions of residue L112 with Ala and Phe in combination with N48K and R111K (Figure 5). When combined with N48K, L112A and L112F had similar  $V_A$  values of  $-9.4 \pm 4.3$  mV and  $-6.2 \pm 1.1$  mV, respectively, whereas the  $V_A$  for N48K alone was  $-45.4 \pm 0.9$  mV (Figure 5B, yellow and green; Table 3). With the further addition of R111K, the two triple mutants again had similar  $V_A$  values at  $+51.2 \pm 5.7$  mV for N48K/R111K/L112A and  $+61.3 \pm 1.9$  mV for N48K/R111K/L112F (Figure 5B, purple and orange). The shift between N48K and N48K/R111K was +84 mV (Figure 5A, Table 4). When R111K was added to N48K/L112A and N48K/L112F, the shifts were much smaller at +61 mV and +68 mV, respectively, suggesting that there is an opposing interaction between R111K and the two L112 substitutions (Figure 5B, purple and orange, Table 4). The triple mutant N48K/R111K/M119V produced the largest shift in  $V_A$  of all

constructs tested, +240 mV, to give a  $V_A$  value of  $+120 \pm 1.8$  mV (Figure 5A, green, Table 4).

We further explored triple combination mutations that did not include the gating charge R4 (R111). The double mutation N48K/L112A shifted  $V_A$  to  $-9.4 \pm 4.3$  mV, whereas the double mutation N48K/M119V shifted  $V_A$  to  $+23.3 \pm 1.9$  mV (Figure 6, light green and purple). Remarkably, the triple mutation N48K/L112F/M119V shifted  $V_A$  by +170 mV (Figure 6, brown, Table 4) and the triple mutation N48K/L112A/M119V shifted  $V_A$  by +200 mV, all the way to  $V_A = +80.8 \pm 4.0$  mV, without mutation of the R4 gating charge (Figure 6, orange, Table 4). These results demonstrate that the electrostatic force exerted on the gating charges by the transmembrane electrical field can be overcome by only three amino acid substitutions, which do not change the charge of the affected amino acid residues yet substantially alter the energetic landscape due to the chemical energy gained from new protein interactions.

### **Positive Shifts in the Voltage Dependence of Gating Charge Movement**

Our extensive studies of broadband tuning of the voltage dependence of activation of the bacterial/human chimera 7DII showed that its voltage sensitivity could be shifted cumulatively by up to +240 mV (Figure 5A, green). However,  $V_A$  is an indirect measure of movement of the S4 gating charges. In order to compare the effects of our  $V_A$ -shifting mutations on both  $V_A$  and the voltage dependence of gating charge movement,  $V_Q$ , we used the  $Na_VAb\Delta 28$  construct that we developed for high-level expression for structural studies (Lenaeus et al., 2017), in which 28 nonconserved amino acid residues are deleted from the C-terminus. This construct allowed introduction of combined  $V_A$ -shifting mutations with high expression. We focused on combination mutations that did not include the R4 gating charge. Introduction of the combination of N48K, L112A, and M119V equivalent mutations (KAV) into  $Na_VAb$  caused a substantial positive shift in the  $V_A$  of  $Na_VAb$  (Figure 7A, green; Table 5). The N48K equivalent mutation alone caused a +75 mV shift of  $V_A$  in  $Na_VAb$  (Figure 7A, blue). The combined KAV mutation further shifted activation positively, to a  $V_A$  of  $+61.3 \pm 2.1$  mV (Figure 7A, green). Importantly, there was no detectable sodium current activated at 0 mV (Figure 7A, green). Thus, the  $Na_VAb\Delta 28/KAV$  channel functions entirely in the positive voltage domain.

$Na_VAb$  is Cys-free, and its relative, NaChBac, has been extensively studied by insertion of Cys residues and subsequent crosslinking by disulfide bond formation (Yarov-Yarovoy et al., 2012). We reasoned that introduction of carefully selected Cys residues might further shift  $V_A$  and  $V_Q$ . As described previously (Wisedchaisri et al., 2019), we identified constructs with pairs of substituted Cys residues that expressed well, retained functional activity, and formed disulfide bonds in the resting state in a voltage-dependent manner. Surprisingly, we found even more positive shifts in  $V_A$  when single Cys residues were substituted for G94 and Q150 (Table 5;

(Wisedchaisri et al., 2019)). G94C and Q150C shifted the voltage dependence of activation of  $\text{Na}_v\text{Ab}/\text{KAV}$  positively to  $V_A = +88.4 \pm 1.1$  mV and  $+76.7 \pm 3.1$  mV, respectively. The double mutant, analyzed under reducing conditions to prevent disulfide bond formation, exhibited a  $V_A$  of  $+105 \pm 0.8$  mV (Table 5; (Wisedchaisri et al., 2019)). Importantly, these channels do not open at 0 mV, but the question of whether their voltage sensors remain in their functionally resting position at that voltage remained to be addressed.

The outward movement of the gating charges can be measured as a capacitive current as shown in classical voltage-clamp studies of the squid giant axon (Armstrong and Bezanilla, 1973). By measuring the outward (ON) movement of the S4 gating charges in response to incremental voltage increases from a very negative membrane potential (Figure 7B), we found that  $V_Q$  was strongly shifted to positive membrane potentials by these  $V_A$ -shifting mutations (Figure 7C). The  $V_Q$  values for these constructs were  $-83.1 \pm 0.7$  mV for  $\text{Na}_v\text{Ab}/\text{N48K}$ ,  $-21.5 \pm 3.7$  mV for  $\text{Na}_v\text{Ab}/\text{KAV}$ , and  $+77.2 \pm 0.4$  mV for  $\text{Na}_v\text{Ab}/\text{KAV}/\text{G94C}$ . These results represent a shift of +62 mV with the addition of the 'AV' mutations to N49K, and +99 mV for the subsequent addition of G94C, for a total Q/V shift of +160 mV (Figure 7C, Table 6). For comparison, the same substitutions shifted the G/V curve by only +127 mV in total (Table 6). Thus, these results show that both gating charge movement and channel activation are prevented at 0 mV in these mutant constructs. Evidently, the positive shifts in  $V_A$  values are driven primarily by positive shifts in  $V_Q$  values.

The OFF gating charge movement occurred at more negative potentials for all constructs, as expected, because of charge immobilization during inactivation that must be reversed by hyperpolarization. The  $V_Q$  for OFF gating charge movement for  $\text{Na}_v\text{Ab}/\text{N49K}$  was  $-152 \pm 0.6$  mV, and the addition of 'AV' in the KAV mutant increased this by +77 mV to a  $V_Q$  of  $-74.7 \pm 6.0$  mV (Figure 7D, Table 6). Addition of G94C resulted in a further +96 mV shift of  $V_Q$  to  $+21.4 \pm 3.3$  mV, representing a total shift of +173 mV (Figure 7D, Table 6). No gating charge movement was observed for  $\text{KAV}/\text{G94C}/\text{Q150C}$  in the absence of dithiothreitol to reduce disulfide bonds ( $n=4$ , data not shown), which supports our conclusion that disulfide-locking of G94C to Q150C prevents S4 translocation.

## DISCUSSION

Our aim in this project was to explore whether broadband tuning of the voltage dependence of a voltage-gated sodium channel is possible. Sodium channels are in the resting state at negative membrane potentials and are activated by depolarization of the membrane to more positive membrane potentials. Although previous work had identified mutations that shift  $V_A$  significantly, those experiments had not tested the extent of voltage shifting that is possible by combinations of mutations. Here we combined previously described mutations in multiple voltage-gated ion channels in order to test the range of positive shifting of  $V_A$  that is possible. We were surprised to find that combination of a small number of mutations was able to shift  $V_A$  up to 240 mV and yet retain normal sodium channel expression and function. Our findings show that broadband shifting of  $V_A$  of a sodium channel is possible and provide a toolbox of methods and constructs that enable exploration of sodium channel states, functions, and structure in the positive membrane potential domain that was previously inaccessible to detailed biophysical and structural studies. The utility of this approach has been proven by use of one of these constructs to lock NavAb in its resting state and determine its structure at high resolution (Wisedchaisri et al., 2019). In addition, our results lead to several important insights into the voltage sensing and voltage-dependent gating of sodium channels as discussed below.

### **Voltage dependence of gating of mammalian Nav channels can be transferred to NavAb**

Sodium channels in bacteria have  $V_A$ 's in the range of -130 mV, consistent with the negative membrane potential of bacteria in the range of -160 mV. In contrast, mammalian sodium channels have  $V_A$ 's in the range of -50 mV to -20 mV, consistent with the resting membrane potentials of nerve and muscle cells of -90 mV to -70 mV. Despite this large difference in voltage sensitivity, the VS of bacterial and mammalian sodium channels are very similar in structure, with RMSD values of  $<3 \text{ \AA}$  in their core transmembrane domains (eg., (Jiang et al., 2020)). Our results show that changes of a small number of amino acid sidechains by mutation is sufficient to give this large difference on voltage-dependent function. Thus, in evolution, it was possible to tune VS function over a broad range without significant structural change.

### **Single $V_A$ shifting mutations from other ion channels can be functionally transferred into NavAb**

The similarity of structure of bacterial and mammalian sodium channel VS suggests that mutations that alter conserved amino acid residues across the broad range of ion channels might have similar effects on voltage dependence. Our results show that mutations initially described in

*Drosophila* potassium channels, mammalian sodium channels, and other distantly related ion channels have similar effects when transferred into the bacterial sodium channel NavAb by site-directed mutations. Evidently, the structural basis for VS function is conserved across phylogeny, and only a small number of molecular changes are required to elicit dramatic changes in voltage dependence.

### **Combined mutations have additive effects on voltage-dependent activation**

Although individual mutations have been frequently shown to shift the  $V_A$  of sodium channels, an exhaustive study of additive effects of combined mutations that shift  $V_A$  has not previously been carried out. Many combination mutations we studied showed increases in  $V_A$  that were greater than either individual mutation alone, combined increases that were approximately additive, or increases in  $V_A$  that were even more than additive when considered simply as the sum of  $V_A$ . Thus, a majority of these mutations worked together to enhance positive shifts in  $V_A$  rather than to oppose those shifts, as judged by this empirical procedure.

### **Combined mutations can shift sodium channel function entirely into the positive membrane potential domain**

We found that multiple triple combinations of mutations are able to shift  $V_A$  entirely into the positive membrane potential domain. For these triple mutations, essentially all individual sodium channels are in the resting state at 0 mV. These results show that a negative transmembrane potential exerting an electrostatic force on the positive gating charges to pull them inward is not necessary for formation of the resting state at 0 mV. Moreover, application of stimuli in the positive voltage range lead to voltage sensor activation and pore opening. Evidently, the chemical energy of altered protein interactions caused by our mutations is sufficient to pull the gating charges into their resting conformation without a negative resting membrane potential, from which they can be activated by imposing positive voltage stimuli.

### **$V_A$ -shifting mutations also shift the voltage dependence of gating charge movement**

In principle, mutations might shift  $V_A$  by impeding the outward movement of the gating charges in response to depolarization, preventing the coupling of gating charge movement to pore opening, or a combination of both effects. Importantly, for the mutations we studied most completely,  $V_Q$  measured from gating currents was shifted to a comparable or even greater extent than  $V_A$ . These studies support the conclusion that the gating charges are locked in place in their resting state by the chemical energy of protein interactions contributed by the mutated amino acid residues in our constructs until the membrane potential is depolarized to 0 mV or beyond.

### **Stabilizing sodium channel functional states**

All structures of native wild-type bacterial and eukaryotic sodium channels have activated or partially activated voltage sensors because there is no membrane potential in a protein crystal or on a cryo-EM grid. Determination of the structures of other sodium channel states will require stabilizing them at 0 mV. Our results provide a toolbox of methods and mutant cDNAs that can stabilize specific functional states at 0 mV for structural studies. We have already used the KAV triple mutant and disulfide locking of substituted Cys residues to stabilize the resting state of Na<sub>v</sub>Ab and determine its structure by cryo-EM (Wisedchaisri et al., 2019). The structure of the resting state revealed remarkable conformation changes, including inward movement of the S4 segment and gating charges by 11.5 Å, which pushes the S4-S5 linker inward into the cytosol to form a sharply bent elbow. These conformational changes poise the resting state for rapid activation upon depolarization. Other mutations described here can in principle stabilize intermediate states of the voltage sensor to capture multiple resting states, partially activated intermediate states, and inactivated states. These approaches offer a pathway toward understanding the complete conformational cycle of voltage-gated sodium channel function.

### **ACKNOWLEDGEMENTS**

We thank Dr. Tamer Gamal El-Din (Pharmacology, University of Washington) for valuable discussion and comments on the manuscript. This research was supported by National Institutes of Health Research Grants R01 NS15751 and R35 NS111573 to W.A.C. and Research Training Grant T32 GM007750 to E.M.

## BIBLIOGRAPHY

- Ahern, C.A., Payandeh, J., Bosmans, F., and Chanda, B. (2016). The hitchhiker's guide to the voltage-gated sodium channel galaxy. *J Gen Physiol* 147, 1-24.
- Armstrong, C.M., and Bezanilla, F. (1973). Currents related to movement of the gating particles of the sodium channels. *Nature* 242, 459-461.
- Armstrong, C.M., and Bezanilla, F. (1977). Inactivation of the sodium channel. II. Gating current experiments. *JGenPhysiol* 70, 567-590.
- Barchi, R.L. (1983). Protein components of the purified sodium channel from rat skeletal sarcolemma. *JNeurochem* 36, 1377-1385.
- Beneski, D.A., and Catterall, W.A. (1980). Covalent labeling of protein components of the sodium channel with a photoactivable derivative of scorpion toxin. *ProcNatlAcadSciUSA* 77, 639-643.
- Bezanilla, F. (2000). The voltage sensor in voltage-dependent ion channels. *Physiol Rev* 80, 555-592.
- Bezanilla, F., and Armstrong, C.M. (1977). Inactivation of the sodium channel. I. Sodium current experiments. *JGenPhysiol* 70, 549-566.
- Blanchet, J., and Chahine, M. (2007). Accessibility of four arginine residues on the S4 segment of the *Bacillus halodurans* sodium channel. *J Membr Biol* 215, 169-180.
- Catterall, W.A. (1986). Molecular properties of voltage-sensitive sodium channels. *AnnuRevBiochem* 55, 953-985.
- Catterall, W.A. (2000). From ionic currents to molecular mechanisms: The structure and function of voltage-gated sodium channels. *Neuron* 26, 13-25.
- Catterall, W.A., Wisedchaisri, G., and Zheng, N. (2017). The chemical basis for electrical signaling. *Nature Chem Biol* 13, 455-463.
- Chanda, B., and Bezanilla, F. (2002). Tracking voltage-dependent conformational changes in skeletal muscle sodium channel during activation. *J Gen Physiol* 120, 629-645.
- DeCaen, P.G., Yarov-Yarovoy, V., Scheuer, T., and Catterall, W.A. (2011). Gating charge interactions with the S1 segment during activation of a Na<sup>+</sup> channel voltage sensor. *Proc Natl Acad Sci U S A* 108, 18825-18830.
- DeCaen, P.G., Yarov-Yarovoy, V., Sharp, E.M., Scheuer, T., and Catterall, W.A. (2009). Sequential formation of ion pairs during activation of a sodium channel voltage sensor. *Proc Natl Acad Sci U S A* 106, 22498-22503.
- DeCaen, P.G., Yarov-Yarovoy, V., Zhao, Y., Scheuer, T., and Catterall, W.A. (2008). Disulfide locking a sodium channel voltage sensor reveals ion pair formation during activation. *Proc Natl Acad Sci U S A* 105, 15142-15147.



Gamal El-Din, T.M., Martinez, G.Q., Payandeh, J., Scheuer, T., and Catterall, W.A. (2013a). A gating charge interaction required for late slow inactivation of the bacterial sodium channel NavAb. *J Gen Physiol* 142, 181-190.

Gamal El-Din, T.M., Martinez, G.Q., Payandeh, J., Scheuer, T., and Catterall, W.A. (2013b). A gating charge interaction required for late slow inactivation of the bacterial sodium channel NavAb. *J Gen Physiol* 142, 181-190.

Hartshorne, R.P., and Catterall, W.A. (1981). Purification of the saxitoxin receptor of the sodium channel from rat brain. *ProcNatlAcadSciUSA* 78, 4620-4624.

Hartshorne, R.P., and Catterall, W.A. (1984). The sodium channel from rat brain. Purification and subunit composition. *J Biol Chem* 259, 1667-1675.

Hartshorne, R.P., Keller, B.U., Talvenheimo, J.A., Catterall, W.A., and Montal, M. (1985). Functional reconstitution of the purified brain sodium channel in planar lipid bilayers. *ProcNatlAcadSciUSA* 82, 240-244.

Hartshorne, R.P., Messner, D.J., Coppersmith, J.C., and Catterall, W.A. (1982). The saxitoxin receptor of the sodium channel from rat brain Evidence for two nonidentical beta subunits. *JBiolChem* 257, 13888-13891.

Heckman, K.L., and Pease, L.R. (2007). Gene splicing and mutagenesis by PCR-driven overlap extension. *Nat Protoc* 2, 924-932.

Hille, B. (2001). *Ionic Channels of Excitable Membranes*, 3rd Ed (Sunderland, MA: Sinauer Associates Inc.).

Hodgkin, A.L., and Huxley, A.F. (1952). A quantitative description of membrane current and its application to conduction and excitation in nerve. *JPhysiol* 117, 500-544.

Jiang, D., Shi, H., Tonggu, L., Gamal El-Din, T.M., Lenaeus, M.J., Zhao, Y., Yoshioka, C., Zheng, N., and Catterall, W.A. (2020). Structure of the cardiac sodium channel. *Cell* 180, 122-134.

Kontis, K.J., Rounaghi, A., and Goldin, A.L. (1997). Sodium channel activation gating is affected by substitutions of voltage sensor positive charges in all four domains. *JGenPhysiol* 110, 391-401.

Lacroix, J.J., Hyde, H.C., Campos, F.V., and Bezanilla, F. (2014). Moving gating charges through the gating pore in a Kv channel voltage sensor. *Proc Natl Acad Sci U S A* 111, E1950-1959.

Lenaeus, M.J., Gamal El-Din, T.M., Ing, C., Ramanadane, K., Pomes, R., Zheng, N., and Catterall, W.A. (2017). Structures of closed and open states of a voltage-gated sodium channel. *Proc Natl Acad Sci U S A* 114, E3051-E3060.

Lopez, G.A., Jan, Y.N., and Jan, L.Y. (1991). Hydrophobic substitution mutations in the S4 sequence alter voltage-dependent gating in Shaker K<sup>+</sup> channels. *Neuron* 7, 327-336.

McCusker, E.C., Bagneris, C., Naylor, C.E., Cole, A.R., D'Avanzo, N., Nichols, C.G., and Wallace, B.A. (2012). Structure of a bacterial voltage-gated sodium channel pore reveals mechanisms of opening and closing. *Nat Commun* 3, 1102.

Miller, J.A., Agnew, W.S., and Levinson, S.R. (1983). Principal glycopeptide of the tetrodotoxin/saxitoxin binding protein from *Electrophorus electricus*: Isolation and partial chemical and physical characterization. *Biochemistry* 22, 462-470.

Noda, M., Ikeda, T., Kayano, T., Suzuki, H., Takeshima, H., Kurasaki, M., Takahashi, H., and Numa, S. (1986). Existence of distinct sodium channel messenger RNAs in rat brain. *Nature* 320, 188-192.

Noda, M., Shimizu, S., Tanabe, T., Takai, T., Kayano, T., Ikeda, T., Takahashi, H., Nakayama, H., Kanaoka, Y., Minamino, N., *et al.* (1984). Primary structure of *Electrophorus electricus* sodium channel deduced from cDNA sequence. *Nature* 312, 121-127.

Pan, X., Li, Z., Huang, X., Huang, G., Gao, S., Shen, H., Liu, L., Lei, J., and Yan, N. (2019). Molecular basis for pore blockade of human Na<sup>+</sup> channel Nav1.2 by the mu-conotoxin KIIIA. *Science* 363, 1309-1313.

Pan, X., Li, Z., Zhou, Q., Shen, H., Wu, K., Huang, X., Chen, J., Zhang, J., Zhu, X., Lei, J., *et al.* (2018). Structure of the human voltage-gated sodium channel Nav1.4 in complex with beta1. *Science* 362, pii: eaau2486.

Pavlov, E., Bladen, C., Winkfein, R., Diao, C., Dhaliwal, P., and French, R.J. (2005). The pore, not cytoplasmic domains, underlies inactivation in a prokaryotic sodium channel. *Biophys J* 89, 232-242.

Payandeh, J., Scheuer, T., Zheng, N., and Catterall, W.A. (2011). The crystal structure of a voltage-gated sodium channel. *Nature* 475, 353-358.

Ren, D., Navarro, B., Xu, H., Yue, L., Shi, Q., and Clapham, D.E. (2001). A prokaryotic voltage-gated sodium channel. *Science* 294, 2372-2375.

Shen, H., Liu, D., Wu, K., Lei, J., and Yan, N. (2019). Structures of human Nav1.7 channel in complex with auxiliary subunits and animal toxins. *Science* 363, 1303-1308.

Shen, H., Zhou, Q., Pan, X., Li, Z., Wu, J., and Yan, N. (2017). Structure of a eukaryotic voltage-gated sodium channel at near-atomic resolution. *Science* 355, eaal4326.

Stuhmer, W., Conti, F., Suzuki, H., Wang, X., Noda, M., Yahadi, N., Kubo, H., and Numa, S. (1989). Structural parts involved in activation and inactivation of the sodium channel. *Nature* 339, 597-603.

Talvenheimo, J.A., Tamkun, M.M., and Catterall, W.A. (1982). Reconstitution of neurotoxin-stimulated sodium transport by the voltage-sensitive sodium channel purified from rat brain. *JBiolChem* 257, 11868-11871.

Tamkun, M.M., Talvenheimo, J.A., and Catterall, W.A. (1984). The sodium channel from rat brain. Reconstitution of neurotoxin-activated ion flux and scorpion toxin binding from purified components. *JBiolChem* 259, 1676-1688.

Vargas, E., Yarov-Yarovoy, V., Khalili-Araghi, F., Catterall, W.A., Klein, M.L., Tarek, M., Lindahl, E., Schulten, K., Perozo, E., Bezanilla, F., *et al.* (2012). An emerging consensus on voltage-

dependent gating from computational modeling and molecular dynamics simulations. *J Gen Physiol* *140*, 587-594.

Wisedchaisri, G., Tonggu, L., McCord, E., Gamal El-Din, T.M., Wang, L., Zheng, N., and Catterall, W.A. (2019). Resting-state structure and gating mechanism of a voltage-gated sodium channel. *Cell* *178*, 993-1003.

Wu, M.T., Huang, P.Y., Yen, C.T., Chen, C.C., and Lee, M.J. (2013). A novel SCN9A mutation responsible for primary erythromelalgia and is resistant to the treatment of sodium channel blockers. *PLoS One* *8*, e55212.

Yang, N., George, A.L., Jr., and Horn, R. (1996). Molecular basis of charge movement in voltage-gated sodium channels. *Neuron* *16*, 113-122.

Yang, N., and Horn, R. (1995). Evidence for voltage-dependent S4 movement in sodium channels. *Neuron* *15*, 213-218.

Yarov-Yarovoy, V., DeCaen, P.G., Westenbroek, R.E., Pan, C.Y., Scheuer, T., Baker, D., and Catterall, W.A. (2012). Structural basis for gating charge movement in the voltage sensor of a sodium channel. *Proc Natl Acad Sci USA* *109* E93-E102.

Zhang, X., Ren, W., DeCaen, P., Yan, C., Tao, X., Tang, L., Wang, J., Hasegawa, K., Kumasaka, T., He, J., *et al.* (2012). Crystal structure of an orthologue of the NaChBac voltage-gated sodium channel. *Nature* *486*, 130-134.

## Figures and Legends

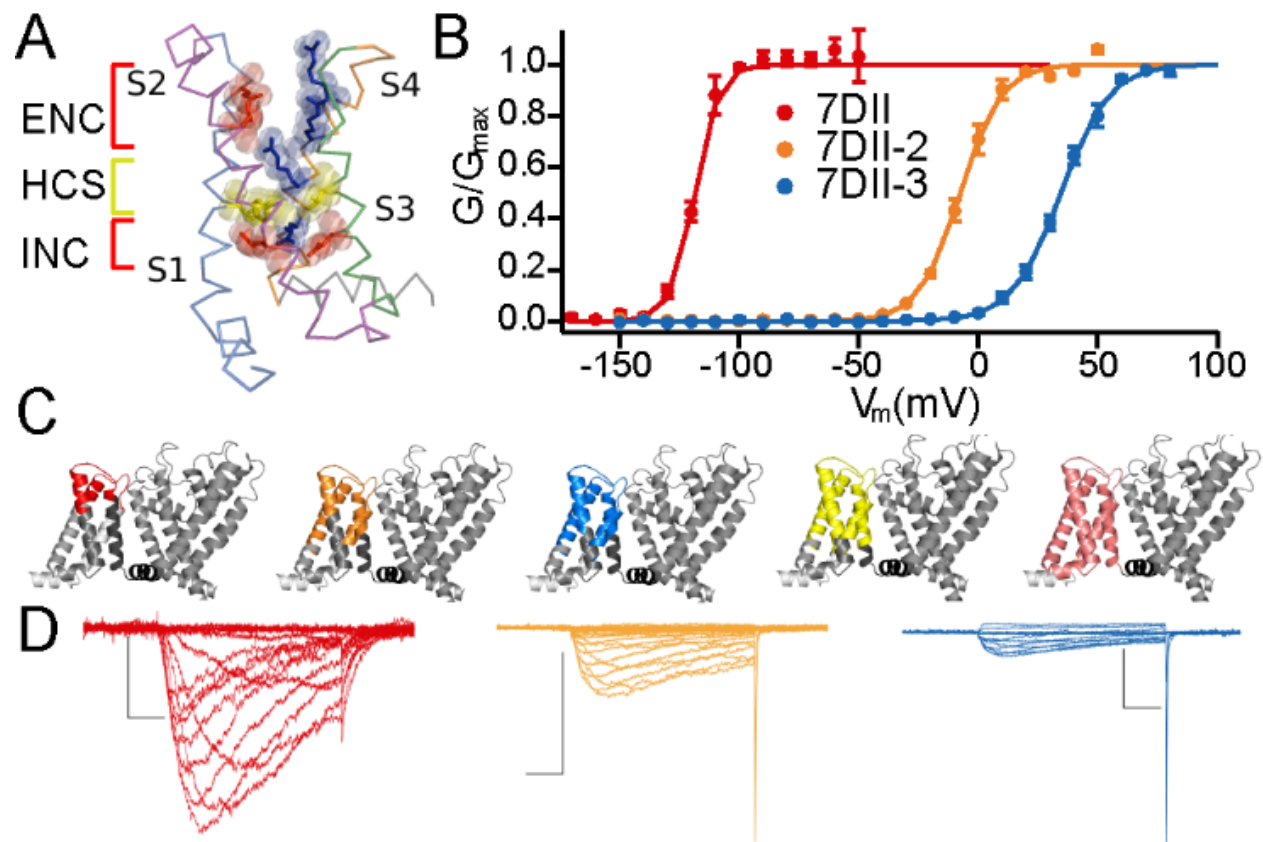

**Figure 1. Voltage dependence of activation of  $Na_VAb$  and  $Na_VAb/Na_V1.7$  chimeras.** **A.** Voltage sensor model highlighting key functional components: ENC, extracellular negative cluster (red); HCS, hydrophobic constriction site (gold); INC, intracellular negative cluster (red); gating charge Arg residues (blue). **B.** Conductance-voltage ( $G/V$ ) relationships of three chimeras containing increasing numbers of human  $Na_V1.7$  residues. **C.** Homology models (Swiss-Model, 5X0M template (Shen et al., 2017), Domain II) were made to highlight the extent of substitution of human residues in five chimeric human-bacterial sodium channels created by replacing  $Na_VAb$  residues with those of human  $Na_V1.7$  DII. The S1-S4 segments are colored from light to dark gray, with the S4-S5 linker in black. The colored portion indicates human residues, while native  $Na_VAb$  residues are in varying shades of gray. The colors correspond to the different chimeric channels. The channels are arranged in order from least to most humanized: red, 7DII; orange, 7DII-2; blue, 7DII-3; yellow, 7DII-4; and pink, 7DII-5. The latter two constructs did not conduct sodium current. **D.** Current records of the three functional chimeras colored as indicated in B and C. Individual  $G/V$  curves were normalized to peak current values and fit with a standard Boltzmann equation. The average  $V_A$  and  $k$  values were used to draw the solid line fits. Datapoints for each construct represent average values at the indicated voltages, and error bars denote mean  $\pm$  SEM.

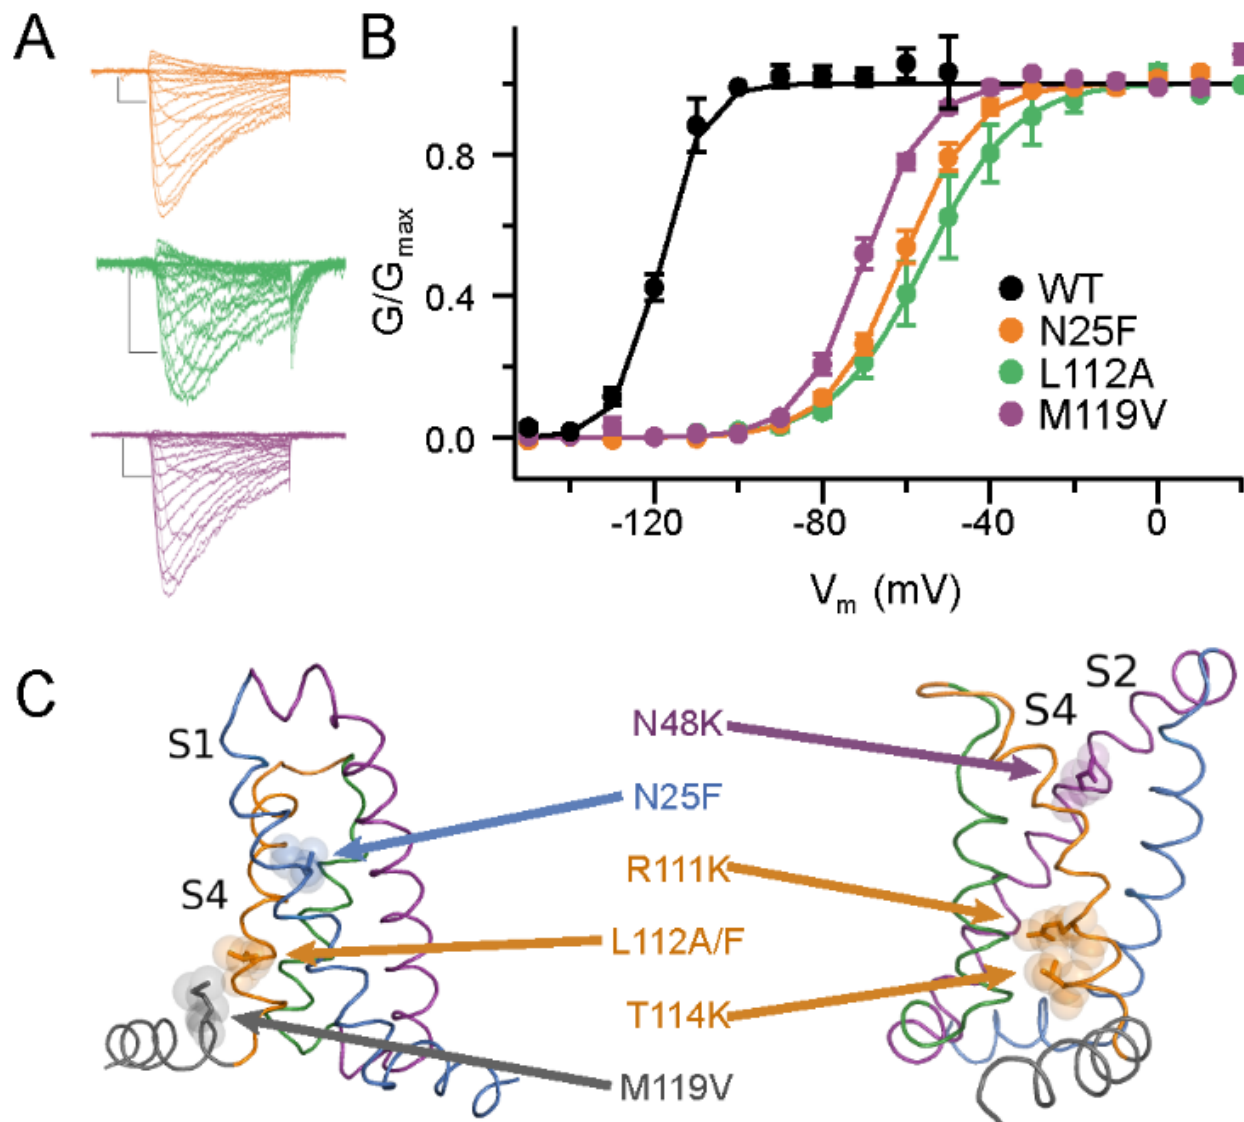

**Figure 2. Functional effects of single uncharged residue substitutions** **A.** Representative current records. **B.** G/V relationships of Na<sub>v</sub>Ab 7DII with three separate hydrophobic substitutions in the VS: WT 7DII, black; M119V, purple; L112A, green; N25F, orange. **C.** Structural model of single residue substitutions. The color of the text corresponds to the coloring of the transmembrane segment in the model on which the residues are found: S1, blue; S2, purple; S3, green; S4, orange; S4-S5 Linker, gray. Individual G/V curves were normalized to peak current values and fit with a standard Boltzmann equation. The average  $V_A$  and  $k$  values were used to draw the solid line fits. Datapoints for each construct represent average values at the indicated voltage, error bars denote mean  $\pm$  SEM.

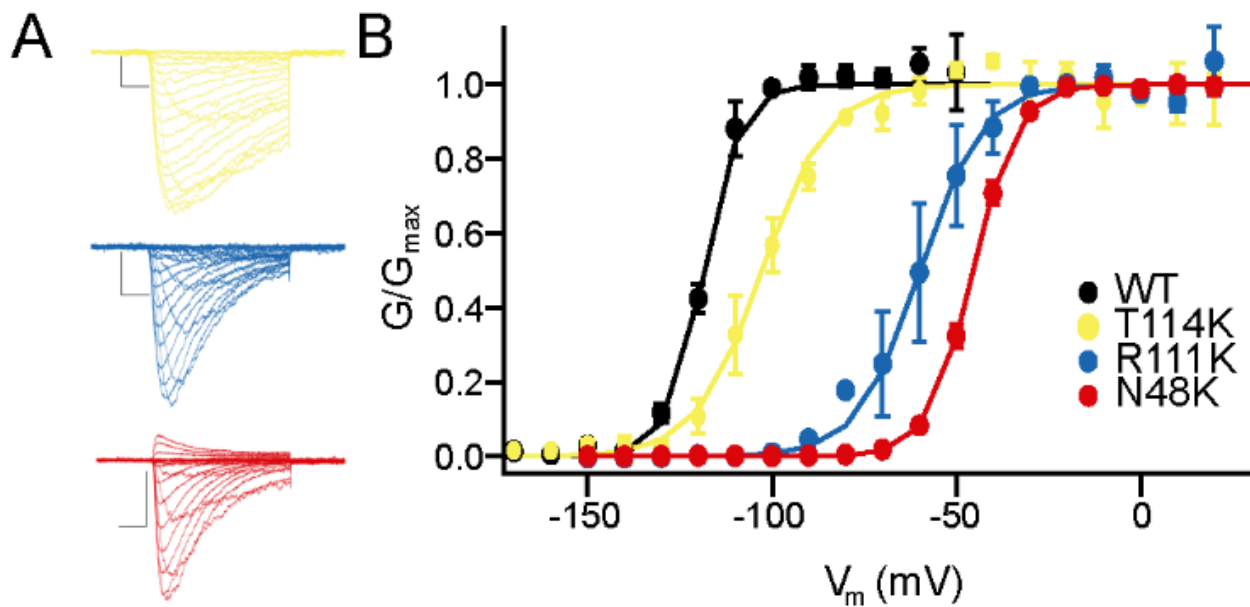

**Figure 3. Functional effects of single charged residue substitutions.** **A.** Representative current records. **B.**  $G/V$  relationships for 7DII alone and with three individual charged residue substitutions: WT 7DII black; T114K, yellow; R111K, blue; and N48K, red. Individual  $G/V$  curves were normalized to peak current values and fit with a standard Boltzmann equation. The average  $V_A$  and  $k$  values were used to draw the solid line fits. Datapoints for each construct represent average values at the indicated voltages, and error bars denote mean  $\pm$  SEM.

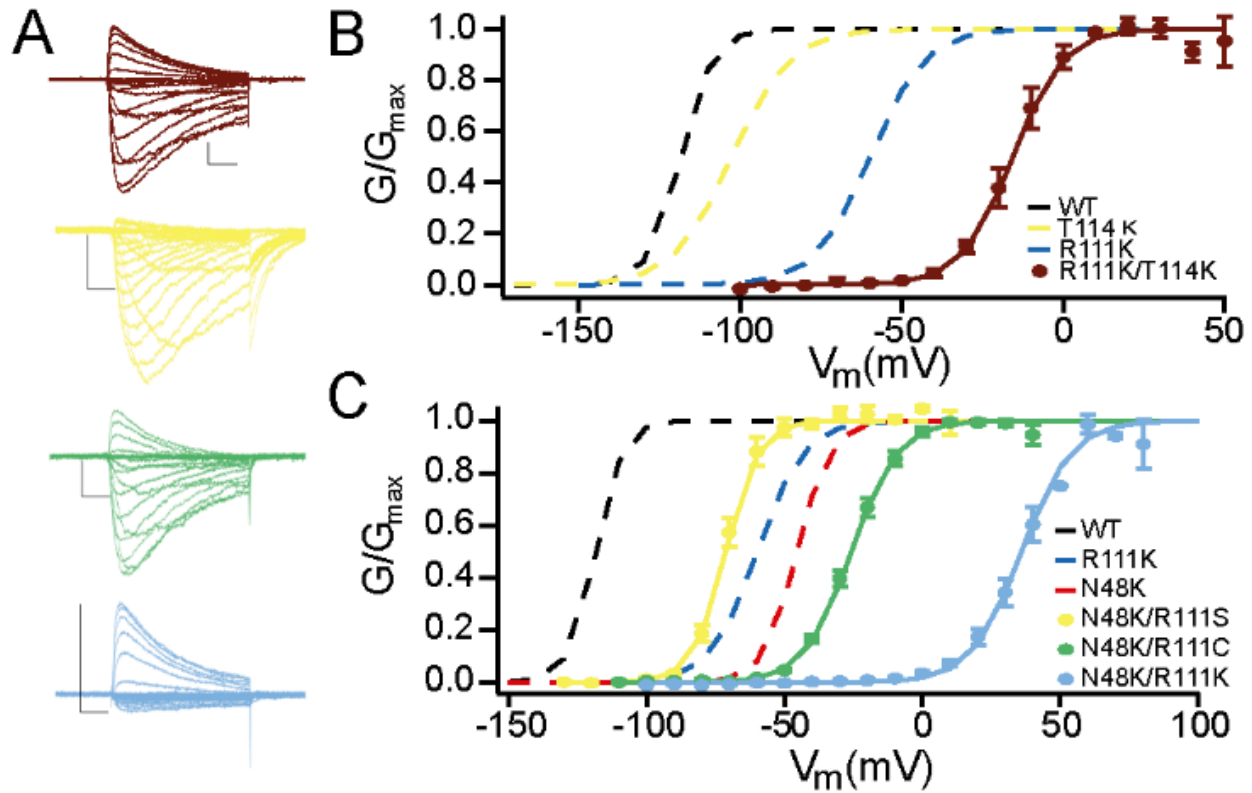

**Figure 4. Combinatorial effects of paired mutations.** **A.** Representative sodium currents. Current records are colored to correspond to their G/V curves in panel B. **B.** G/V relationships for WT 7DII,  $Na_vAb/R111K$  alone, blue; T114K alone, yellow; and R111K/T114K (brown). **C.** G/V relationships for WT 7DII and double mutants: N48K/R111S, yellow; N48K/R111C, green; N48K/R111K, light blue. Dashed traces for the indicated constructs are presented for comparison based on data in previous figures. Individual G/V curves were normalized to peak current values and fit with a standard Boltzmann equation. The average  $V_A$  and  $k$  values were used to draw the solid and dotted line fits. Datapoints for each construct represent average values at the indicated voltages, and error bars denote mean  $\pm$  SEM. Dashed lines denote the average G/V fit of constructs described in previous figures.



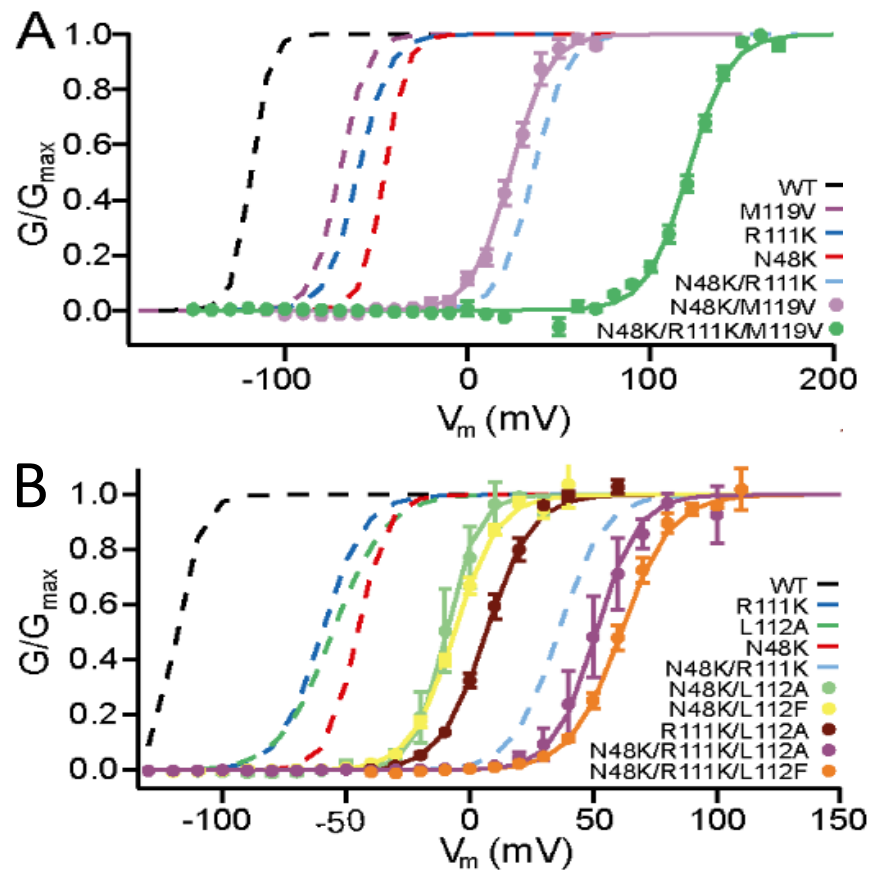

**Figure 5. Combinations of N48K, R111K, and M119V or L112A/F.** **A.** G/V relationships of WT 7DII (black), 7DII/N48K/M119V (lavender) and N48K/R111K/M119V (green). **B.** G/V relationships of WT 7DII (black), 7DII/N48K/L112A (green), N48K/L112F (yellow), R111K/L112A (brown), N48K/R111K/L112A (purple), and N48K/R111K/L112F (orange). Dashed traces for the indicated constructs are presented for comparison based on data in previous figures. Individual G/V curves were normalized to peak current values and fit with a standard Boltzmann equation. The average  $V_A$  and  $k$  values were used to draw the solid and dotted line fits. Datapoints for each construct represent average values at the indicated voltages, and error bars denote mean  $\pm$  SEM. Dashed lines denote the average G/V fit of constructs described in previous figures.

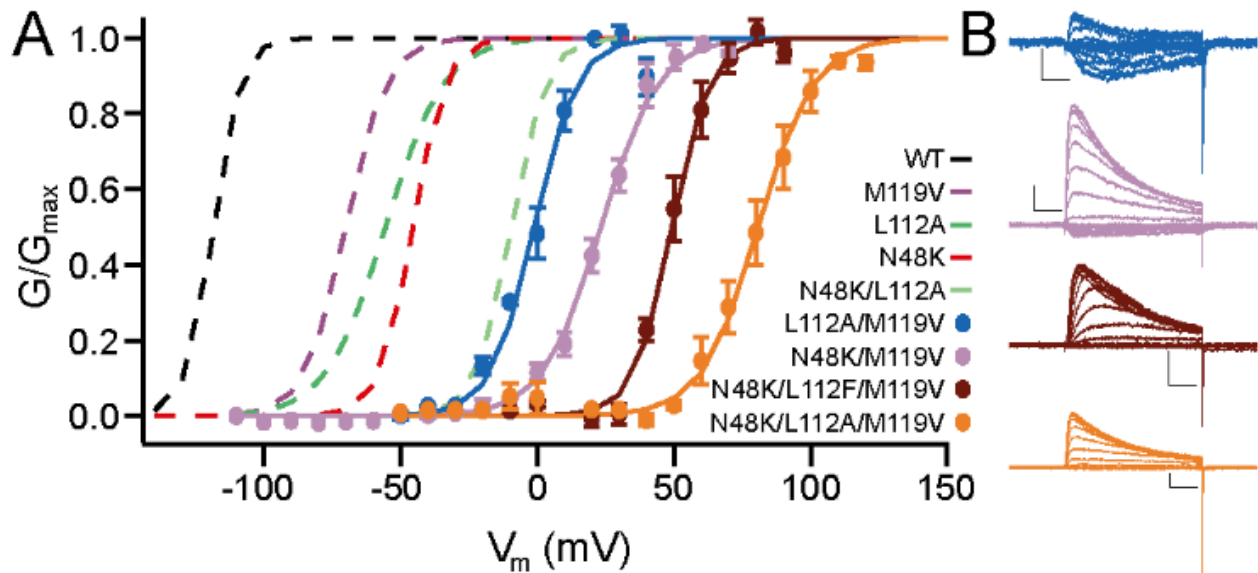

**Figure 6. Voltage dependence of activation of 7DII with combinations of N48K, L112A, and M119V (KAV).** **A.**  $G/V$  relationships for the 7DII chimeras with single, double, and triple combinations of N48K, M119V, L112A. WT 7DII (black dashes); M119V (purple dashes); L112A (green dashes); N48K (red dashes); N48K/L112A (light green dashes); L112A/M119V (blue); N48K/M119V (purple); N48K/L112F/M119V (brown); N48K/L112A/M119V (orange). Individual  $G/V$  curves were normalized to peak current values and fit with a standard Boltzmann equation. The average  $V_A$  and  $k$  values were used to draw the solid and dotted line fits. Datapoints for each construct represent average values at the indicated voltages, and error bars denote mean  $\pm$  SEM. Dashed lines denote the average  $G/V$  fit of constructs described in previous figures. **B.** Representative current records are colored to correspond to their respective  $G/V$  curves. From top to bottom they are 7DII/L112A/M119V, N48K/M119V, N48K/L112F/M119V, and N48K/L112A/M119V.

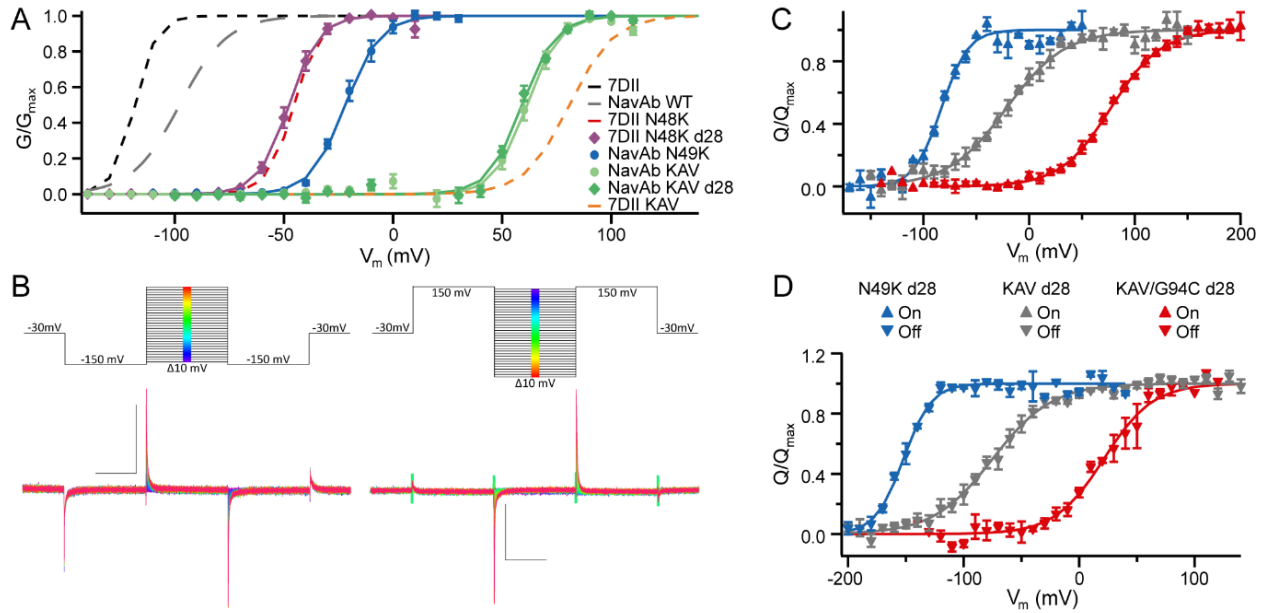

**Figure 7. Comparison of the effects of the KAV mutations on G/V and Q/V relationships. A.** G/V relationships for the indicated constructs: 7DII (black dashes); NavAb (gray dashes); 7DII/N48K (red dashes); 7DII $\Delta$ 28/N48K (purple diamonds); NavAb/N49K (blue circles); NavAb N49K/L112A/M1119V (KAV, light green circles); NavAb $\Delta$ 28/KAV (green diamonds), and 7DII/KAV (orange dashes). **B.** Voltage command diagrams and representative gating current traces of NavAb $\Delta$ 28/KAV for ON (left) and OFF (right) gating current measurements. Calibration bars indicate 1 nA and 10 msec. **C.** ON gating charge measurements in response to depolarization in media that contained NMDG-Cl substituted for NaCl and CaCl<sub>2</sub>. Cells were briefly hyperpolarized, and the subsequent current step was increased in 10 mV increments. **D.** OFF gating charge movement in response to hyperpolarization following brief depolarizing prepulses. A P/5 leak subtraction was used at voltages that remained well outside the range of charge movement in either the positive or negative direction. The area under the curve was calculated and plotted as a function of voltage. When necessary, traces were baseline corrected to the current remaining at the end of the test pulse. Individual Q/V curves were fit with a standard Boltzmann equation. The average  $V_Q$  and  $k$  values were used to draw the solid line fits. Datapoints for each construct represent average values at the indicated voltage. Error bars denote mean  $\pm$  SEM. KAV d28 denotes NavAb/KAV/ $\Delta$ 28.



**Table 2. Activation parameters of Nav1.7/NavAb-VS2 chimeras**

| Chimera | $V_A$            | k             | $Z_{app}$     | n    |
|---------|------------------|---------------|---------------|------|
| 7DII    | $-118.0 \pm 0.9$ | $5.0 \pm 0.3$ | $5.1 \pm 0.4$ | 7    |
| 7DII-2  | $-7.5 \pm 1.7$   | $8.5 \pm 0.6$ | $2.9 \pm 0.2$ | 2    |
| 7DII-3  | $34.6 \pm 1.4$   | $10 \pm 0.5$  | $2.5 \pm 0.1$ | 6    |
| 7DII-4  | N.D.             | N.D.          | N.D.          | N.D. |
| 7DII-5  | N.D.             | N.D.          | N.D.          | N.D. |

$V_A$ , half maximal activation voltage; k, slope factor;  $Z_{app}$ , apparent gating charge movement. Mean  $\pm$  SEM. N.D., not determined.

**Table 3. Activation parameters for 7DII single substitutions**

| Chimera Mutant    | $V_A$            | k              | $Z_{app}$      | n |
|-------------------|------------------|----------------|----------------|---|
| 7DII              | $-118.0 \pm 0.9$ | $5.0 \pm 0.3$  | $5.1 \pm 0.4$  | 7 |
| N25F              | $-61.0 \pm 1.4$  | $8.6 \pm 0.5$  | $2.9 \pm 0.2$  | 5 |
| N48K              | $-45.4 \pm 0.9$  | $6.0 \pm 0.2$  | $4.2 \pm 0.2$  | 8 |
| N48K/ $\Delta$ 28 | $-47.8 \pm 1.8$  | $6.9 \pm 0.3$  | $3.6 \pm 0.2$  | 3 |
| R111K             | $-59.8 \pm 6.6$  | $8.4 \pm 0.6$  | $3.0 \pm 0.02$ | 2 |
| L112A             | $-55.0 \pm 4.9$  | $10.5 \pm 1.6$ | $2.4 \pm 0.4$  | 2 |
| T114K             | $-102.0 \pm 2.9$ | $8.9 \pm 1.0$  | $2.9 \pm 0.4$  | 3 |
| M119V             | $-70.0 \pm 1.2$  | $7.4 \pm 0.2$  | $3.3 \pm 0.1$  | 5 |

$V_A$ , half maximal activation voltage; k, slope factor;  $Z_{app}$ , apparent gating charge movement. Mean  $\pm$  SEM.

**Table 4. Activation parameters of 7DII and combinations of substitutions**

| Chimera Mutant    | $V_A$            | k               | $Z_{app}$     | n  |
|-------------------|------------------|-----------------|---------------|----|
| 7DII              | $-118.0 \pm 0.9$ | $5.0 \pm 0.3$   | $5.1 \pm 0.4$ | 7  |
| N25F/R111K/L112A* | $21.9 \pm 0.7$   | $6.2 \pm 0.9$   | $4.1 \pm 0.6$ | 2  |
| N25F/M119V*       | $14.3 \pm 0.2$   | $12.4 \pm 0.1$  | $2.0 \pm 0.2$ | 2  |
| N48K/R111C        | $-25.8 \pm 1.2$  | $8.4 \pm 0.3$   | $3.0 \pm 0.1$ | 12 |
| N48K/R111K        | $38.4 \pm 1.9$   | $10.5 \pm 0.6$  | $2.4 \pm 0.1$ | 3  |
| N48K/R111S        | $-71.1 \pm 1.5$  | $5.9 \pm 0.6$   | $4.3 \pm 0.4$ | 4  |
| N48K/L112A        | $-9.4 \pm 4.3$   | $6.3 \pm 0.6$   | $4.0 \pm 0.4$ | 3  |
| N48K/L112F        | $-6.2 \pm 1.1$   | $8.7 \pm 0.24$  | $2.8 \pm 0.1$ | 5  |
| N48K/M119V        | $23.3 \pm 1.9$   | $10.4 \pm 0.3$  | $2.4 \pm 0.1$ | 4  |
| N48K/R111K/L112A  | $51.2 \pm 5.7$   | $8.3 \pm 0.50$  | $3.0 \pm 0.2$ | 3  |
| N48K/R111K/L112F  | $61.3 \pm 1.9$   | $10.1 \pm 0.49$ | $2.4 \pm 0.1$ | 6  |
| N48K/R111K/M119V  | $120.0 \pm 1.8$  | $11.3 \pm 0.5$  | $2.2 \pm 0.1$ | 3  |
| N48K/L112A/M119V  | $80.8 \pm 4.0$   | $10.1 \pm 0.50$ | $2.5 \pm 0.1$ | 4  |
| N48K/L112F/M119V  | $49.4 \pm 2.1$   | $6.8 \pm 1.2$   | $3.9 \pm 0.8$ | 3  |
| R111K/L112A       | $6.7 \pm 1.5$    | $9.1 \pm 0.7$   | $2.7 \pm 0.2$ | 2  |
| R111K/T114K       | $-15.7 \pm 2.6$  | $7.8 \pm 0.5$   | $3.2 \pm 0.2$ | 3  |
| L112A/M119V       | $1.1 \pm 1.2$    | $7.9 \pm 0.9$   | $2.6 \pm 0.2$ | 3  |

$V_A$ , half maximal activation voltage; k, slope factor;  $Z_{app}$ , apparent gating charge movement. Mean  $\pm$  SEM. \*Data not shown.

**Table 5. Activation parameters of  $Na_vAb$ /N49K and KAV constructs**

| $Na_vAb$ Mutant             | $V_A$           | k              | $Z_{app}$     | n |
|-----------------------------|-----------------|----------------|---------------|---|
| N49K                        | $-21.8 \pm 1.8$ | $7.9 \pm 1.0$  | $3.2 \pm 0.3$ | 4 |
| KAV                         | $61.3 \pm 2.1$  | $7.2 \pm 0.4$  | $3.4 \pm 0.2$ | 3 |
| KAV/ $\Delta$ 28            | $59.2 \pm 0.8$  | $7.7 \pm 0.8$  | $3.3 \pm 0.3$ | 3 |
| KAV/G94C/ $\Delta$ 28       | $88.4 \pm 1.1$  | $10.5 \pm 0.4$ | $2.3 \pm 0.1$ | 3 |
| KAV/Q150C                   | $77.8 \pm 0.8$  | $9.8 \pm 0.3$  | $2.5 \pm 0.7$ | 3 |
| KAV/Q150C/ $\Delta$ 28      | $76.7 \pm 3.1$  | $10.0 \pm 0.9$ | $2.5 \pm 0.2$ | 4 |
| KAV/G94C/Q150C/ $\Delta$ 28 | $105.0 \pm 0.8$ | $10.2 \pm 0.2$ | $2.4 \pm 0.6$ | 3 |

$V_A$ , half maximal activation voltage; k, slope factor;  $Z_{app}$ , apparent gating charge movement. Mean  $\pm$  SEM.

**Table 6. On and Off gating charge parameters of NavAb/N49K and KAV mutants**

| NavAb Mutant           | On $V_Q$         | k               | $Z_{app}$       | n |
|------------------------|------------------|-----------------|-----------------|---|
| N49K/ $\Delta$ 28      | $-83.1 \pm 0.7$  | $12.5 \pm 0.1$  | $2.0 \pm 0.01$  | 2 |
| KAV/ $\Delta$ 28       | $-21.5 \pm 3.7$  | $27.8 \pm 2.5$  | $0.91 \pm 0.85$ | 4 |
| KAV/G94C               | $77.2 \pm 0.4$   | $23.69 \pm 2.3$ | $1.07 \pm 0.11$ | 4 |
|                        | Off $V_Q$        | k               | $Z_{app}$       | n |
| N49K/ $\Delta$ 28      | $-152.0 \pm 0.6$ | $12.1 \pm 0.5$  | $2.0 \pm 0.1$   | 2 |
| KAV/ $\Delta$ 28       | $-74.7 \pm 6.0$  | $25.6 \pm 2.1$  | $1.0 \pm 0.1$   | 4 |
| KAV/G94C/ $\Delta$ 28  | $21.4 \pm 3.3$   | $21.0 \pm 3.8$  | $1.5 \pm 0.3$   | 3 |
| KAV/Q150C/ $\Delta$ 28 | $-54.0 \pm 4.7$  | $37.6 \pm 4.0$  | $0.7 \pm 0.1$   | 2 |

$V_Q$ , half maximal activation voltage of gating charge movement; k, slope factor;  $Z_{app}$ , apparent gating charge movement. Mean  $\pm$  SEM.
